# Supplementary material for: Preparation of a High-Performance Asymmetric Supercapacitor by Recycling Aluminum Paper and Filter Components of Heated Tobacco
Source: MDPI journal article supplement (doi:10.3390/ma16196454), 2023-09-28
Supplement: s1 [file s1]

Supplementary Materials

# Preparation of a High-Performance Asymmetric Supercapacitor by Recycling Aluminum Paper and Filter Components of Heated Tobacco

Ha-Yeong Kim <sup>1,†</sup>, Suk Jekal <sup>1,†</sup>, Chan-Gyo Kim <sup>1</sup>, Jungchul Noh <sup>2</sup>, Jiwon Kim <sup>1</sup>, Yeon-Ryong Chu <sup>1</sup>,  
Zambaga Otgonbayar <sup>1</sup>, Won-Chun Oh <sup>3</sup>, Sang Hun Lee <sup>1</sup> and Chang-Min Yoon <sup>1,\*</sup>

<sup>1</sup> Department of Chemical and Biological Engineering, Hanbat National University, Daejeon 34158, Republic of Korea

<sup>2</sup> McKetta Department of Chemical Engineering and Texas Material Institute, The University of Texas at Austin, Austin, TX 78712, USA

<sup>3</sup> Department of Advanced Materials Science and Engineering, Hanseo University, Seosan-si 31962, Republic of Korea

\* Correspondence: cmyoon4321@hanbat.ac.kr; Tel.: +82-42-821-1528; Fax: +82-42-821-1593

† These authors contributed equally to this work.

**Citation:** Kim, H.-Y.; Jekal, S.; Kim, C.-G.; Noh, J.; Kim, J.; Chu, Y.-R.; Otgonbayar, Z.; Oh, W.-C.; Lee, S.H.; Yoon, C.-M. Preparation of a High-Performance Asymmetric Supercapacitor by Recycling Aluminum Paper and Filter Components of Heated Tobacco. *Materials* **2023**, *16*, x. <https://doi.org/10.3390/xxxxx>

Academic Editors: Stefano Guarino and Flaviana Tagliaferri

Received: 15 August 2023

Revised: 25 September 2023

Accepted: 26 September 2023

Published: 28 September 2023

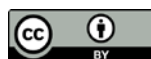

**Copyright:** © 2023 by the authors. Submitted for possible open access publication under the terms and conditions of the Creative Commons Attribution (CC BY) license (<https://creativecommons.org/licenses/by/4.0/>).

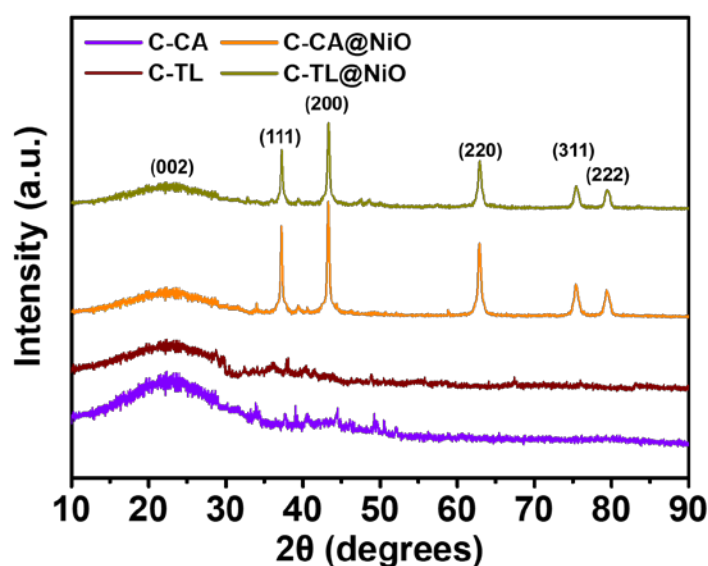

**Figure S1.** X-ray diffraction (XRD) spectra of C-CA, C-TL, C-CA@NiO, and C-TL@NiO materials.

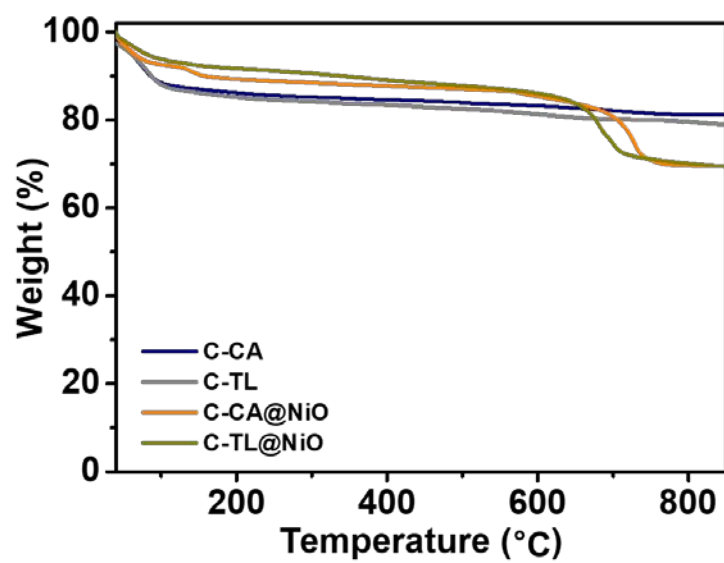

Figure S2. TGA thermograms of C-CA, C-TL, C-CA@NiO, and C-TL@NiO materials.
